# Supplementary material
Source: publisher site journal article supplement (https://www.dovepress.com/article/381985)
Supplement: Supplementary file 1 [file get_supplementary_file.php]

**Supplementary Figure**

**Daytime and nighttime visual analog scales may be useful in assessing asthma control levels before and after treatment**

Rei Fujiki, Tomotaka Kawayama, Kyoji Furukawa, Takashi Kinoshita,

Kazuko Matsunaga, and Tomoaki Hoshino

**Supplementary Figure 1 The ROC curves with the MCID of total ACT scores as a reference in the daytime and nighttime VAS 4 weeks and 8 weeks after treatments.**

**
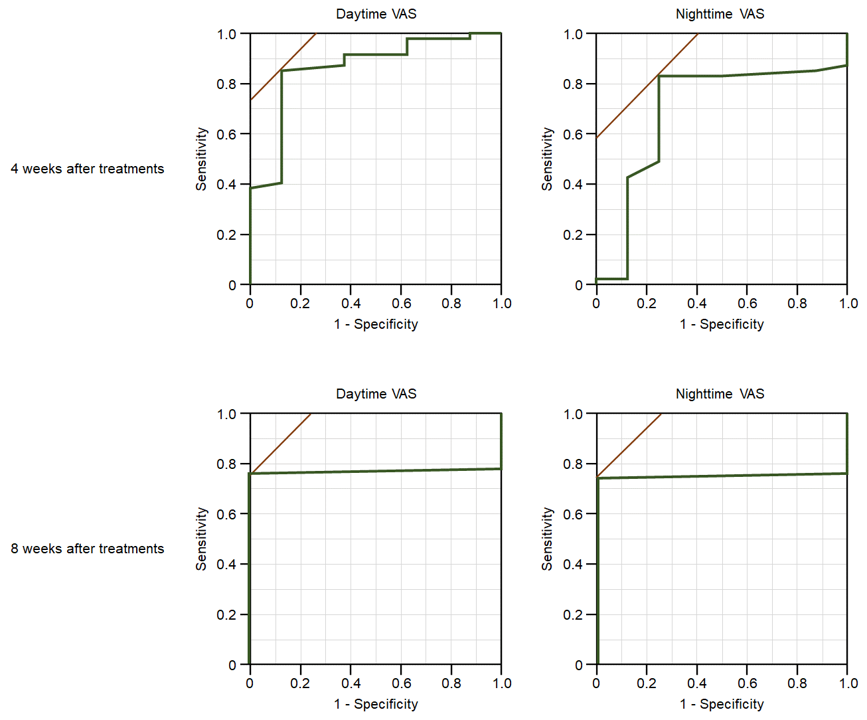
**

**Notes:** Changes in PROs were calculated as values 4 weeks or 8 weeks after treatments – values before treatments. A change of 3 points or more in the ACT was used as a reference for MCID.

**Abbreviations:** ACT, asthma control test; MCID, minimal clinically important difference; ROC, Receiver Operating Characteristic; VAS, visual analog scale; PROs, patient-reported outcomes

**Supplementary Tables**

**Daytime and nighttime visual analog scales may be useful in assessing asthma control levels before and after treatment**

Rei Fujiki, Tomotaka Kawayama, Kyoji Furukawa, Takashi Kinoshita,

Kazuko Matsunaga, and Tomoaki Hoshino

**Supplementary Table 1. Comorbidities**

**A) Profiles of comorbidities**

| Comorbidity | n (%) |
| --- | --- |
| Any other allergic disease | 21 (38.2) |
| Allergic rhinitis | 20 (36.4) |
| Chronic sinusitis with nasal polyps | 1 (1.8) |
| Atopic dermatitis | 1 (1.8) |
| ANCA-related diseases | 0 (0) |
| Hypertension | 15 (27.2) |
| Hyperlipidemia | 9 (16.4) |
| Anxiety | 4 (7.3) |
| Collagen vascular diseases | 2 (3.6) |
| Gastroesophageal reflux disease | 2 (3.6) |
| Diabetes | 1 (2.0) |
| Central nervous system disorder or cerebrovascular disease | 1 (1.8) |
| Chronic hepatitis | 1 (1.8) |
| Atrial fibrillation | 2 (3.6) |
| Benign prostatic hyperplasia | 1 (1.8) |

**Notes:** Data are expressed as the number (%) of patients with comorbidities. None of the patients had heart and kidney diseases or malignancies.

**B) Characteristics between patients with and those without other allergic comorbidities before treatment**

| Characteristics | With  other allergic comorbidities  n = 21 | Without  other allergic comorbidities  n = 34 | P value |
| --- | --- | --- | --- |
| Age, yrs | 45.9 (15.0) | 52.1 (16.5) | 0.2 |
| Body mass index, kg/m2 | 22.0 (2.2) | 23.5 (4.2) | 0.1 |
| White blood cells count, x109 cells/µL | 6.70 (1.17) | 5.89 (1.43) | 0.0368* |
| %Eosinophils, % | 4.6 (2.4) | 3.4 (2.1) | 0.0564 |
| Eosinophils, x103 cells/µL | 332 (175) | 190 (113) | 0.0007* |
| %Neutrophils, % | 54.0 (5.2) | 55.3 (8.5) | 0.6 |
| Neutrophils, x103 cells/µL | 2,061 (205) | 2,078 (332) | 0.9 |
| Serum total IgE, IU/mL | 113 (104) | 158 (285) | 0.5 |
| FENO, ppb | 56.8 (39.1) | 33.7 (24.4) | 0.0115* |
| ACT, points | 14.4 (2.5) | 13.5 (3.3) | 0.3 |
| Daytime VAS, cm | 6.8 (1.8) | 7.6 (1.8) | 0.1 |
| Nighttime VAS, cm | 7.6 (1.9) | 7.7 (1.9) | 0.9 |
| %FVC predicted, % | 99.3 (15.3) | 94.9 (20.4) | 0.4 |
| %FEV1 predicted, % | 91.4 (15.7) | 91.2 (25.5) | 1.0 |
| FEV1/FVC ratio | 0.79 (0.08) | 0.78 (0.11) | 1.0 |

**Notes:** Data are expressed as the mean (standard deviation). Data were compared between patients with and those without other allergic comorbidities by using Student’s t-test. The chi-square test demonstrated that the odds ratio (95% confidence interval) for women to have other allergic comorbidities was 2.5 (0.60 to 10.42) compared to men (*P* = 0.3).

* *P* <0.05 between patients with and without other allergic comorbidities

**Abbreviation:** ACT, asthma control test; ANCA, antineutrophil cytoplasmic antibody; FENO, fractional exhaled nitrogen oxide; FEV1, forced expiratory volume in 1 second; FVC, forced vital capacity; Ig, immunoglobin; VAS, visual analog scale

**Supplemental Tables 2. Correlation between characteristics and biomarkers before treatment**

| Characteristics | serum total IgE, IU/mL | %FEV1 predicted, % | %FVC predicted, % | FENO, ppb | %Neutrophils, % | %Eosinophils, % |
| --- | --- | --- | --- | --- | --- | --- |
| Age, yrs | -0.21  *P* = 0.1 | 0.34  *P* = 0.0102* | -0.16  *P* = 0.2 | -0.17  *P* = 0.2 | 0.17  *P* = 0.2 | -0.00  *P* = 1.0 |
| Body mass index, kg/m2 | -0.31  *P* = 0.0248* | 0.22  *P* = 0.1 | 0.04  *P* = 0.8 | -0.20  *P* = 0.1 | -0.29  *P* = 0.0459* | 0.14  *P* = 0.3 |
| WBC count, /µL | 0.17  *P* = 0.2 | -0.07  *P* = 0.6 | -0.04  *P* = 0.8 | 0.23  *P* = 0.09 | 0.11  *P* = 0.4 | -0.10  *P* = 0.5 |
| %Eosinophils, % | -0.15  *P* = 0.3 | 0.08  *P* = 0.6 | 0.00  *P* = 1.0 | 0.17  *P* = 0.2 | -0.50  *P* = 0.0004* |  |
| %Neutrophils, % | 0.06  *P* = 0.9 | 0.25  *P* = 0.09 | 0.01  *P* = 0.9 | -0.10  *P* = 0.5 |  |  |
| FENO, ppb | 0.30  *P* = 0.0337* | -0.21  *P* = 0.1 | -0.04  *P* = 0.9 |  |  |  |
| %FVC predicted, % | -0.12  *P* = 0.4 | 0.75  *P* <0.0001* |  |  |  |  |
| %FEV1 predicted, % | -0.32  *P* = 0.0189* |  |  |  |  |  |

**Notes:** Spearman’s test was used to calculate the correlations (*r*) in the table. Univariable analysis demonstrated that the white blood cell count was significantly associated with the blood eosinophil (*r* = 0.27, *P* = 0.0497) and neutrophil (*r* = 0.29, *P* = 0.0444) counts, but not with age (*r* = -0.16, *P* = 0.3) or body mass index (*r* = -0.02, *P* = 0.9), whereas the eosinophil and neutrophil counts were significantly negatively correlated (*r* = -0.32, *P* = 0.0282). Univariable analysis also showed that the FVC and FEV1 were associated with age (*r* = -0.37, *P* = 0.0049 and *r* = -0.27, *P* = 0.0465, respectively) and height (*r* = 0.72, *P* < 0.0001 and *r* = 0.62, *P* < 0.001, respectively), whereas multiple regression analysis with body mass index as cofactor (*β* [95% confidence interval], *P* value) demonstrated that FVC and FEV1 were significantly associated with age (-0.02 [-0.03 to -0.01], *P* < 0.0001 and -0.02 [-0.03 to -0.01], *P* = 0.0030, respectively) and gender (0.41 [0.21 to 0.61], *P* = 0.0002 and 0.34 [0.14 to 0.53], *P* = 0.0012, respectively).

* *P* <0.05 with a significant correlation

**Abbreviations:** CI, confidence interval;FENO, fractional exhaled nitric oxide; FEV1, forced expiratory volume in 1 second; FVC, forced vital capacity; Ig, immunoglobulin; WBC, white blood cells

**Supplementary Table 3.** **The correlation between the PROs and characteristics before treatment**

**A) Unadjusted correlation between the PROs and characteristics** **using Spearman’s test.**

| Characteristics |  | ACT | |  | Daytime VAS | |  | Nighttime VAS | |
| --- | --- | --- | --- | --- | --- | --- | --- | --- | --- |
|  | *r* | *P* value |  | *r* | *P* value |  | *r* | *P* value |
| Age, year |  | -0.08 | 0.4 |  | 0.17 | 0.2 |  | 0.17 | 0.2 |
| Body mass index, kg/m2 |  | -0.06 | 0.7 |  | 0.07 | 0.6 |  | 0.08 | 0.6 |
| White blood cells count, x109cells/L |  | 0.44 | 0.0024* |  | -0.32 | 0.0222* |  | -0.50 | 0.0006* |
| % Eosinophils, % |  | -0.08 | 0.6 |  | 0.13 | 0.4 |  | 0.10 | 0.5 |
| % Neutrophils, % |  | 0.16 | 0.3 |  | -0.12 | 0.4 |  | -0.06 | 0.7 |
| Serum total IgE levels, IU/mL |  | 0.09 | 0.8 |  | -0.03 | 0.8 |  | -0.33 | 0.0152* |
| FENO, ppb |  | 0.23 | 0.1 |  | -0.41 | 0.0019* |  | -0.17 | 0.2 |
| FVC, L |  | 0.12 | 0.4 |  | -0.27 | 0.0446* |  | -0.11 | 0.4 |
| %FVC predicted, % |  | 0.25 | 0.1 |  | 0.25 | 0.1 |  | 0.05 | 0.7 |
| FEV1, L |  | 0.03 | 0.8 |  | -0.22 | 0.0990 |  | -0.02 | 0.9 |
| %FEV1 predicted, % |  | 0.20 | 0.2 |  | 0.11 | 0.4 |  | 0.11 | 0.4 |
| FEV1/FVC ratio |  | 0.17 | 0.2 |  | 0.02 | 0.9 |  | 0.26 | 0.1 |

**B)** **Multiple regression analysis between the PROs and characteristics in the total study population**

| covariates | ACT | | Daytime VAS | | Nighttime VAS | |
| --- | --- | --- | --- | --- | --- | --- |
| *β* (95% CI) | *P* value | *β* (95% CI) | *P* value | *β* (95% CI) | *P* value |
| Age, year | -0.04 (-0.13 to 0.05) | 0.4 | 0.01 (-0.03 to 0.05) | 0.7 | 0.00 (-0.06 to 0.07) | 0.9 |
| Gender, men | 0.29 (-0.88 to 1.46)) | 0.6 | -0.38 (-0.93 to 0.17) | 0.2 | -0.04 (-0.83 to 0.75) | 0.9 |
| Body mass index, kg/m2 | -0.07 (-0.40 to 0.24) | 0.6 | 0.00 (-0.15 to 0.15) | 1.0 | -0.07 (-0.29 to 0.13) | 0.5 |
| Presence of other allergic comorbidities, yes | -0.24 (-1.42 to 0.93) | 0.7 | 0.29 (-0.27 to 0.85) | 0.3 | 0.00 (-0.79 to 0.79) | 1.0 |
| %Eosinophils, % | -0.17 (-0.85 to 0.48) | 0.6 | -0.11 (-0.42 to 0.21) | 0.5 | 0.04 (-0.40 to 0.50) | 0.8 |
| %Neutrophils, % | 0.01 (-0.18 to 0.20) | 0.9 | -0.05 (-0.14 to 0.04) | 0.3 | -0.04 (-0.17 to 0.09) | 0.5 |
| Serum total IgE levels, IU/mL | 0.00 (-0.00 to 0.01) | 0.7 | 0.00 (-0.00 to 0.00) | 0.2 | -0.00 (-0.01 to 0.00) | 0.4 |
| FENO, ppb | 0.01 (-0.04 to 0.05) | 0.8 | -0.01 (-0.03 to 0.01) | 0.2 | -0.01 (-0.03 to 0.02) | 0.6 |
| %FVC predicted, % | -0.00 (-0.12 to 0.12) | 1.0 | -0.03 (-0.08 to 0.03) | 0.4 | -0.02 (-0.11 to 0.06) | 0.6 |
| %FEV1 predicted, % | 0.06 (-0.05 to 0.18) | 0.3 | 0.00 (-0.05 to 0.06) | 0.9 | 0.02 (-0.06 to 0.10) | 0.6 |

**C) Multiple regression analysis between the PROs and characteristics in the subpopulation of patients without other allergic comorbidities**

| covariates | ACT | | Daytime VAS | | Nighttime VAS | |
| --- | --- | --- | --- | --- | --- | --- |
| *β* (95% CI) | *P* value | *β* (95% CI) | *P* value | *β* (95% CI) | *P* value |
| Age, year | -0.01 (-0.21 to 0.19) | 0.9 | 0.02 (-0.06 to 0.11) | 0.5 | -0.01 (-0.32 to 0.11) | 0.8 |
| Gender, men | -0.23 (-1.94 to 1.45)) | 0.8 | -0.26 (-0.95 to 0.43) | 0.4 | 0.30 (-0.70 to 1.30) | 0.5 |
| Body mass index, kg/m2 | -0.14 (-0.55 to 0.24) | 0.6 | 0.07 (-0.10 to 0.24) | 0.4 | -0.12 (-0.36 to 0.13) | 0.3 |
| %Eosinophils, % | -0.17 (-0.85 to 0.28) | 0.5 | -0.23 (-0.68 to 0.21) | 0.3 | -0.10 (-0.75 to 0.54) | 0.7 |
| %Neutrophils, % | 0.01 (-0.26 to 0.29) | 0.9 | -0.03 (-0.14 to 0.09) | 0.6 | -0.04 (-0.20 to 0.12) | 0.6 |
| Serum total IgE levels, IU/mL | -0.01 (-0.02 to 0.01) | 0.5 | 0.00 (-0.00 to 0.00) | 0.2 | -0.00 (-0.01 to 0.01) | 0.7 |
| FENO, ppb | -0.04 (-0.15 to 0.08) | 0.5 | -0.02 (-0.06 to 0.03) | 0.5 | 0.04 (-0.03 to 0.10) | 0.3 |
| %FVC predicted, % | 0.03 (-0.22 to 0.29) | 0.8 | -0.00 (-0.10 to 0.10) | 1.0 | -0.05 (-0.19 to 0.10) | 0.5 |
| %FEV1 predicted, % | 0.04 (-0.17 to 0.26) | 0.7 | -0.01 (-0.10 to 0.07) | 0.7 | 0.02 (-0.11 to 0.14) | 0.8 |

**D) Multiple regression analysis between the PROs and characteristics in the subpopulation of patients with other allergic comorbidities**

| covariates | ACT | | Daytime VAS | | Nighttime VAS | |
| --- | --- | --- | --- | --- | --- | --- |
| *β* (95% CI) | *P* value | *β* (95% CI) | *P* value | *β* (95% CI) | *P* value |
| Age, year | -0.04 (-0.26 to 0.19) | 0.7 | 0.01 (-0.08 to 0.10) | 0.8 | -0.04 (-0.20 to 0.11) | 0.4 |
| Gender, men | 0.84 (-1.72 to 3.40)) | 0.5 | -0.60 (-1.60 to 0.40) | 0.2 | -0.78 (-2.52 to 0.96) | 0.3 |
| Body mass index, kg/m2 | 0.07 (-1.51 to 1.65) | 0.9 | -0.08 (-0.69 to 0.53) | 0.8 | -0.13 (-1.20 to 0.95) | 0.8 |
| %Eosinophils, % | -0.03 (-1.70 to 1.65) | 1.0 | -0.11 (-0.76 to 0.55) | 0.7 | 0.21 (-0.93 to 1.35) | 0.7 |
| %Neutrophils, % | 0.29 (-0.21 to 0.79) | 0.2 | -0.35 (-0.55 to -0.16) | 0.00# | -0.13 (-0.47 to 0.21) | 0.4 |
| Serum total IgE levels, IU/mL | 0.01 (-0.02 to 0.03) | 0.7 | 0.00 (-0.01 to 0.01) | 0.7 | 0.01 (-0.01 to 0.03) | 0.3 |
| FENO, ppb | -0.01 (-0.09 to 0.08) | 0.8 | -0.00 (-0.04 to 0.03) | 0.7 | -0.02 (-0.07 to 0.04) | 0.5 |
| %FVC predicted, % | 0.15 (-0.18 to 0.47) | 0.3 | -0.09 (-0.22 to 0.04) | 0.1 | -0.01 (-0.23 to 0.21) | 0.9 |
| %FEV1 predicted, % | -0.13 (-0.45 to 0.19) | 0.4 | 0.12 (-0.00 to 0.24) | 0.06 | 0.09 (-0.13 to 0.31) | 0.4 |

# *P* = 0.0035

**Notes:** With regard to gender differences, there was no significant difference in ACT (13.2 ± 3.1 for men vs. 14.1 ± 3.0 for women, *P* = 0.4) and daytime (7.3 ± 1.5 for men vs. 7.3 ± 1.9 for women, *P* = 1.0) and nighttime VAS (7.8 ± 1.5 for men vs. 7.6 ± 2.0 for women, *P* = 0.7) between genders. In regard to body mass index (BMI), there was no significant difference in ACT (13.9 ± 3.2 for obese vs. 13.9 ± 3.0 for non-obese, *P* = 1.0) and daytime (7.4 ± 1.6 for obese vs. 7.3 ± 1.9 for non-obese, *P* = 0.8) and nighttime VAS (7.8 ± 1.4 for obese vs. 7.7 ± 2.0 for non-obese, *P* = 0.9) between obese (BMI >25 kg/m2, n = 12) and non-obese (BMI ≤25kg/m2, n = 43) patients. There were no significant differences in the ACT scores (14.1 ± 2.5 with other allergic comorbidities vs. 13.7 ± 3.3 without other allergic comorbidities, *P* = 0.7) and daytime (7.5 ± 6.9 with other allergic comorbidities vs. 13.9 ± 3.0 without other allergic comorbidities, *P* = 0.2) and nighttime (7.6 ± 1.9 with other allergic comorbidities vs. 7.7 ± 2.0 without other allergic comorbidities, *P* = 0.8) VAS between patients with and those without other allergic comorbidities. Further, with regard to obstructive ventilatory patterns in spirometry, there was no significant difference in ACT (13.8 ± 2.9 for obstructive vs. 14.1 ± 3.8 for non-obstructive, *P* = 0.8) and daytime (7.3 ± 1.7 for obstructive vs. 7.3 ± 2.3 for non-obstructive, *P* = 1.0) and nighttime VAS (7.8 ± 1.7 for obstructive vs. 7.1 ± 2.8 for non-obstructive, *P* = 0.3) between patients with obstructive (n = 10) and non-obstructive patterns (n = 45). The number of patients with restrictive patterns was limited (n = 3) statistically.

A) The unadjusted correlation between the PROs and characteristics before treatment shows that there was no correlation between PROs and the % eosinophils and neutrophils, although the white blood cell count was positively associated with the ACT score and negatively associated with the daytime and nighttime VAS scores. The daytime VAS score was negatively associated with the FENO and FEV1, whereas the nighttime VAS score was negatively associated with serum total IgE levels. B) The multiple regression analysis with cofactors such as age, gender, body mass index, and other allergic comorbidities shows that there was no correlation of PROs with biomarkers and lung functions before treatment in the total study population. C) In the subpopulation of patients without other allergic comorbidities, the multiple regression analysis with cofactors, such as age, gender, body mass index, and other allergic comorbidities, shows that there was no correlation of PROs with biomarkers and lung functions before treatment. D) In the subpopulation of patients with other allergic comorbidities, the multiple regression analysis with cofactors such as age, gender, body mass index, and other allergic comorbidities shows that the daytime VAS score was significantly negatively associated with the % neutrophils (*P* = 0.0035).

* *P* <0.05 with a significant correlation

**Abbreviations:** ACT, asthma control test; CI, confidence interval; FENO, fractional exhaled nitrogen oxide; FEV1, forced expiratory volume in 1 second; FVC, forced vital capacity; Ig, immunoglobin; PROs, patient-reported outcomes; VAS, visual analog scale

**Supplementary Table 4. Changes in lung functions and FENO 8 weeks after treatment**

|  | Before treatment | 8 weeks after treatment | *P* value |
| --- | --- | --- | --- |
| Lung function |  |  |  |
| FVC, L | 2.76 ± 0.75 | 2.91 ± 0.68 | 0.2773 |
| %FVC predicted, % | 96.6 ± 18.6 | 102.2 ± 14.4 | 0.0793 |
| FEV1, L | 2.18 ± 0.68 | 2.44 ± 0.65 | 0.0488* |
| FEV1 predicted, % | 91.3 ± 22.1 | 102.1 ± 16.2 | 0.0043* |
| FEV1/FVC ratio | 0.79 ± 0.10 | 0.84 ± 0.09 | 0.0052* |
| FENO, ppb | 49.2 ± 49.1 | 31.0 ± 24.6 | 0.0163* |

**Notes:** The proportion of patients with obstructive ventilatory pattern was significantly decreased from 18.2% (n =10) to 3.7% (n=2) 8 weeks after treatment (*P* = 0.0287).

* *P* <0.05 between before and 8 weeks after treatment

**Abbreviations:** FENO, fractional exhaled nitrogen oxide; FEV1, forced expiratory volume in 1 second; FVC, forced vital capacity

**Supplementary Table 5. Unadjusted correlation between the changes in PROs and characteristics 8 weeks after treatment**

| Characteristics |  | Changes in ACT scores | |  | Changes in daytime VAS | |  | Changes in nighttime VAS | |
| --- | --- | --- | --- | --- | --- | --- | --- | --- | --- |
|  | *r* | *P* value |  | *r* | *P* value |  | *r* | *P* value |
| ***Before treatment*** |  |  |  |  |  |  |  |  |  |
| ACT score, points |  | -0.73 | <0.0001* |  | 0.45 | 0.0006* |  | 0.46 | 0.0004* |
| Daytime VAS, cm |  | 0.13 | 0.3 |  | 0.78 | <0.0001* |  | -0.14 | 0.3 |
| Nighttime VAS, cm |  | 0.41 | 0.0018* |  | 0.20 | 0.1 |  | -0.78 | <0.0001* |
| Age, years |  | -0.13 | 0.3 |  | -0.04 | 0.8 |  | 0.00 | 1.0 |
| Body mass index, kg/m2 |  | 0.04 | 0.8 |  | -0.07 | 0.6 |  | -0.05 | 0.7 |
| White blood cell count, x109 cells/L |  | -0.26 | 0.0583 |  | 0.24 | 0.0782 |  | 0.38 | 0.0056* |
| % Eosinophils, % |  | 0.28 | 0.0389* |  | -0.05 | 0.7 |  | -0.26 | 0.0569 |
| % Neutrophils, % |  | -0.28 | 0.0504 |  | 0.25 | 0.0931 |  | 0.21 | 0.2 |
| Serum total IgE level, IU/mL |  | -0.17 | 0.2 |  | 0.04 | 0.8 |  | 0.34 | 0.0130* |
| FENO, ppb |  | -0.00 | 0.9 |  | 0.28 | 0.0473* |  | 0.01 | 1.0 |
| FVC, L |  | 0.09 | 0.5 |  | 0.27 | 0.0436* |  | 0.14 | 0.3 |
| %FVC predicted, % |  | -0.15 | 0.3 |  | 0.16 | 0.3 |  | 0.01 | 0.9 |
| FEV1, L |  | 0.01 | 0.9 |  | 0.18 | 0.2 |  | -0.00 | 0.9 |
| %FEV1 predicted, % |  | -0.16 | 0.2 |  | 0.04 | 0.8 |  | -0.09 | 0.5 |
| ***After treatment*** |  |  |  |  |  |  |  |  |  |
| Change in FENO 8 weeks after treatment, ppb |  | 0.04 | 0.7 |  | -0.32 | 0.0216* |  | 0.05 | 0.7 |
| Change in FVC 8 weeks after treatment, L |  | 0.10 | 0.5 |  | -0.11 | 0.4 |  | -0.13 | 0.4 |
| Change in % FVC predicted 8 weeks after treatment, % |  | 0.00 | 0.7 |  | -0.16 | 0.2 |  | -0.09 | 0.5 |
| Change in FEV1 8 weeks after treatment, L |  | -0.01 | 0.5 |  | 0.16 | 0.3 |  | 0.23 | 0.0986 |
| Change in % FEV1 predicted 8 weeks after treatment, % |  | -0.09 | 0.5 |  | 0.02 | 0.9 |  | 0.19 | 0.1 |

**Notes:** Correlations in the table were determined with Spearman’s test. There were no significant differences (men vs. women) in changes in ACT (7.9 ± 3.6 vs. 8.2 ± 3.1, *P* = 0.8) score and daytime (-4.8 ± 1.5 vs. -5.4 ± 1.9, *P* = 0.3) and nighttime VAS (-5.7 ± 2.0 vs. -6.2 ± 2.3, *P* = 0.4) scores 8 weeks after treatment between the genders. There were no significant differences (patients with vs. those without other allergic comorbidities) in changes in ACT (7.9 ± 2.4 vs. 8.4 ± 3.6, *P* = 0.6) scores and daytime (-5.0 ± 1.8 vs. -5.6 ± 1.9, *P* = 0.2) and nighttime VAS (-5.9 ± 2.1 vs. -6.2 ± 2.4, *P* = 0.7) scores 8 weeks after treatment between patients with and those without other allergic comorbidities.

* *P* <0.05 with a significant correlation

**Abbreviations:** ACT, asthma control test; FENO, fractional exhaled nitrogen oxide; FEV1, forced expiratory volume in 1 second; FVC, forced vital capacity; Ig, immunoglobin; PROs, patient-reported outcomes; VAS, visual analog scale
